# Supplementary material for: Perturbation-based gene regulatory network inference to unravel oncogenic mechanisms
Source: Springer Nature journal article supplement (doi:10.1038/s41598-020-70941-y), 2020-08-25
Supplement: 41598_2020_70941_MOESM1_ESM.pdf [file 41598_2020_70941_MOESM1_ESM.pdf]

# Supporting Information for ‘Perturbation-based gene regulatory network inference to unravel oncogenic mechanisms’

Daniel Morgan<sup>1</sup>, Matthew Studham<sup>1</sup>, Andreas Tjärnberg<sup>1,2</sup>, Holger Weishaupt<sup>3</sup>, Fredrik J. Swartling<sup>3</sup>, Torbjörn E. M. Nordling<sup>4\*</sup>, Erik L.L. Sonnhammer<sup>1\*</sup>

<sup>1</sup>Department of Biochemistry and Biophysics, Stockholm University, Science for Life Laboratory, Box 1031, 17121 Solna, Sweden. <sup>2</sup>Lionel Lab, Center for Developmental Genetics, New York University. <sup>3</sup>Rudbeck Laboratory, Department of Immunology, Genetics and Pathology, Science for Life Laboratory, Uppsala University, Uppsala, Sweden. <sup>4</sup>Department of Mechanical Engineering, National Cheng Kung University, Taiwan.

\* Corresponding authors [Erik.Sonnhammer@SciLifeLab.se](mailto:Erik.Sonnhammer@SciLifeLab.se), [torbjörn.nordling@nordlinglab.org](mailto:torbjörn.nordling@nordlinglab.org)

# Perturbation-based gene regulatory network inference to unravel oncogenic mechanisms

Daniel Morgan<sup>1</sup>, Matthew Studham<sup>1</sup>, Andreas Tjärnberg<sup>1,2</sup>, Holger Weishaupt<sup>3</sup>, Fredrik J. Swartling<sup>3</sup>, Torbjörn E. M. Nordling<sup>4\*</sup>, Erik L.L. Sonnhammer<sup>1\*</sup>

<sup>1</sup>Department of Biochemistry and Biophysics, Stockholm University, Science for Life Laboratory, Box 1031, 17121 Solna, Sweden. <sup>2</sup>Lionel Lab, Center for Developmental Genetics, New York University. <sup>3</sup>Rudbeck Laboratory, Department of Immunology, Genetics and Pathology, Science for Life Laboratory, Uppsala University, Uppsala, Sweden. <sup>4</sup>Department of Mechanical Engineering, National Cheng Kung University, Taiwan.

\* Corresponding authors [Erik.Sonnhammer@SciLifeLab.se](mailto:Erik.Sonnhammer@SciLifeLab.se), [torbjörn.nordling@nordlinglab.org](mailto:torbjörn.nordling@nordlinglab.org)

## Supporting Information Legends

**S1 Fig. Comparison of the two technical replicates in terms of qPCR cycles.**

**S2 Fig. Volcano plot describing fold change and significance of the knockdown responses.**

**S3 Fig. Independent validation of inferred GRNs' topologies.** Each x-axis tick mark shows the prediction performance in terms of the wRSS error of each inferred GRN topology (circles) fit to independent validation data under cross-validation, compared to its shuffled topologies. The box displays the median and interquartile range, and whiskers bound points maximally extending 1.5 times this range. Beyond this, outlier points are shown.

**S4 Fig. Independent validation of inferred GRNs' fit to measured data.** Each x-axis tick mark shows the prediction performance in terms of the wRSS of an inferred GRN topology fit to independent validation data under cross-validation, compared to its ability to fit shuffled data. X marks represent the inferred GRNs. The filled color box displays the median and interquartile range, and whiskers bound points maximally extending 1.5 times this range. Beyond this, outlier points are shown.

**S5 Fig. Predictiveness of inferred GRN topologies using  $R^2$  for the same GRNs as in Fig 2.**

**S6 Fig. Experimental validation of the predicted activation of CCNB1 by BRD4.** CCNB1 expression was measured as  $\log_{10}$  of counts per million reads after 2 and 6 hours of exposure to control (DMSO) and JQ1, which inhibits BRD4. The effect on CCNB1 was significant at both time points ( $p=0.048$  and  $0.014$  by t-test).

**S7 Fig.** Experimental validation in the human adult high-grade glioma U3056 cell line of the predicted activation of CCNB1 by BRD4. CCNB1 expression was measured as  $\log_{10}$  of counts per million reads after 6 hours exposure to control (DMSO) and JQ1, which inhibits BRD4. The effect on CCNB1 was significant ( $p=0.005$  by t-test).

## Supporting Information

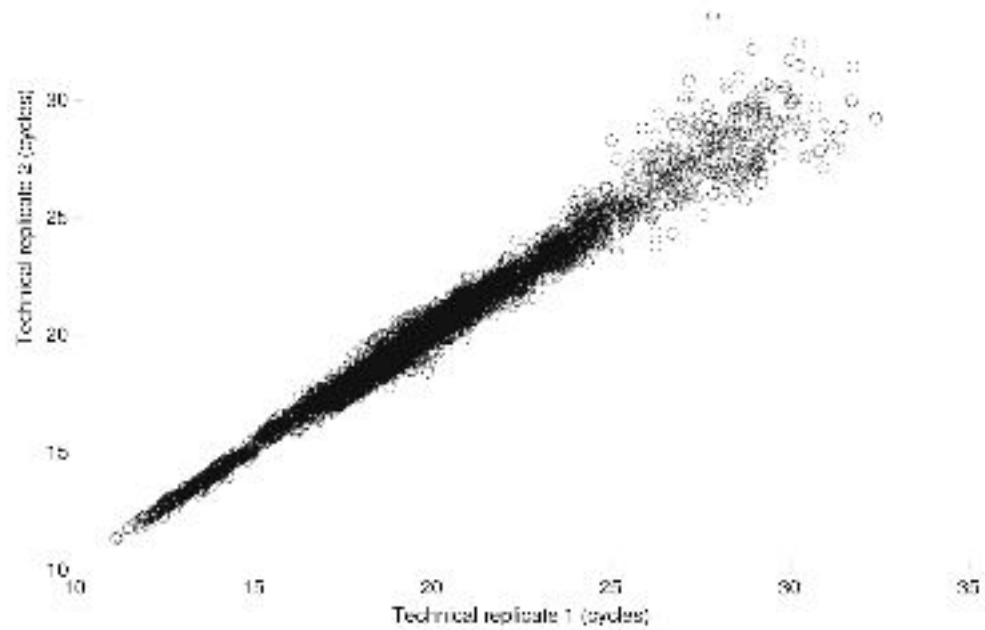

**S1 Fig.** Comparison of the two technical replicates in terms of qPCR cycles.

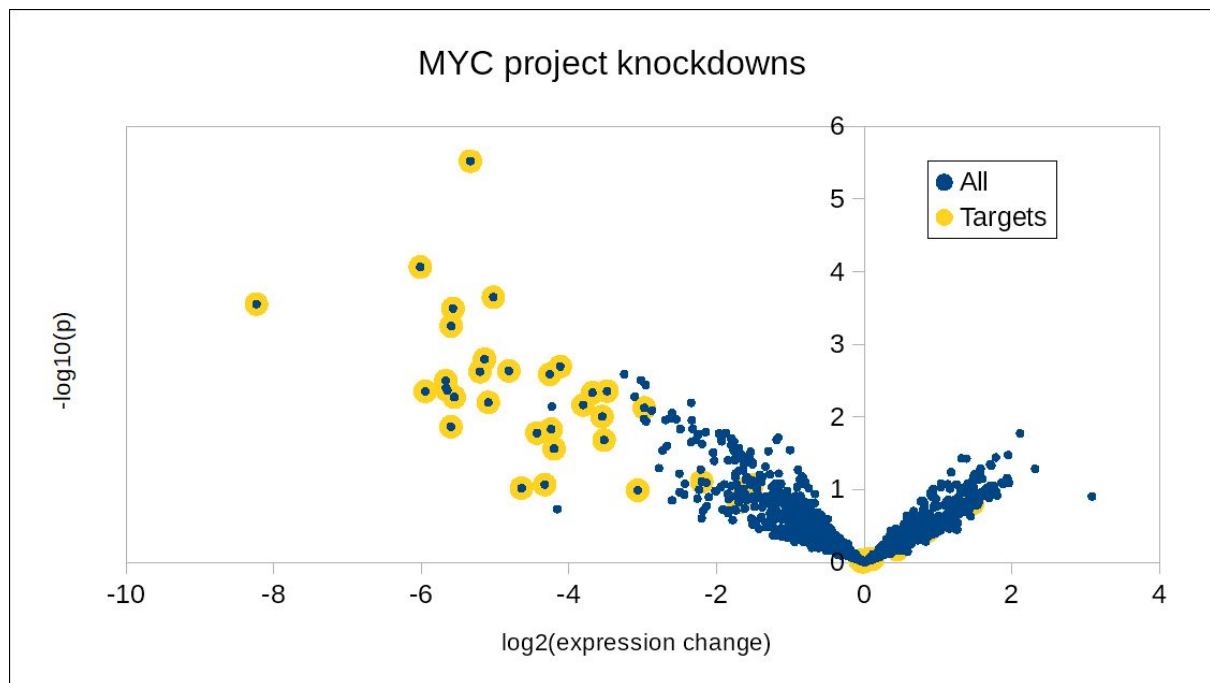

**S2 Fig.** Volcano plot describing fold change and significance of the knockdown responses.

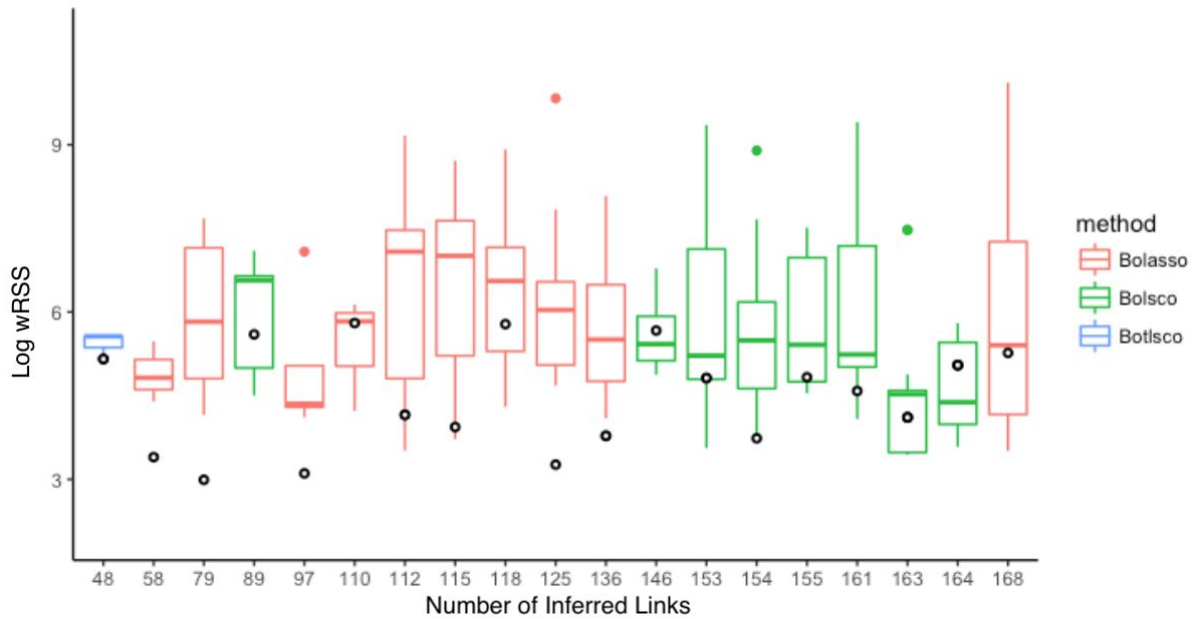

**S3 Fig.** Independent validation of inferred GRNs' topologies. Each x-axis tick mark shows the prediction performance in terms of the wRSS error of each inferred GRN topology (circles) fit to independent validation data under cross-validation, compared to its shuffled topologies. The box displays the median and interquartile range, and whiskers bound points maximally extending 1.5 times this range. Beyond this, outlier points are shown.

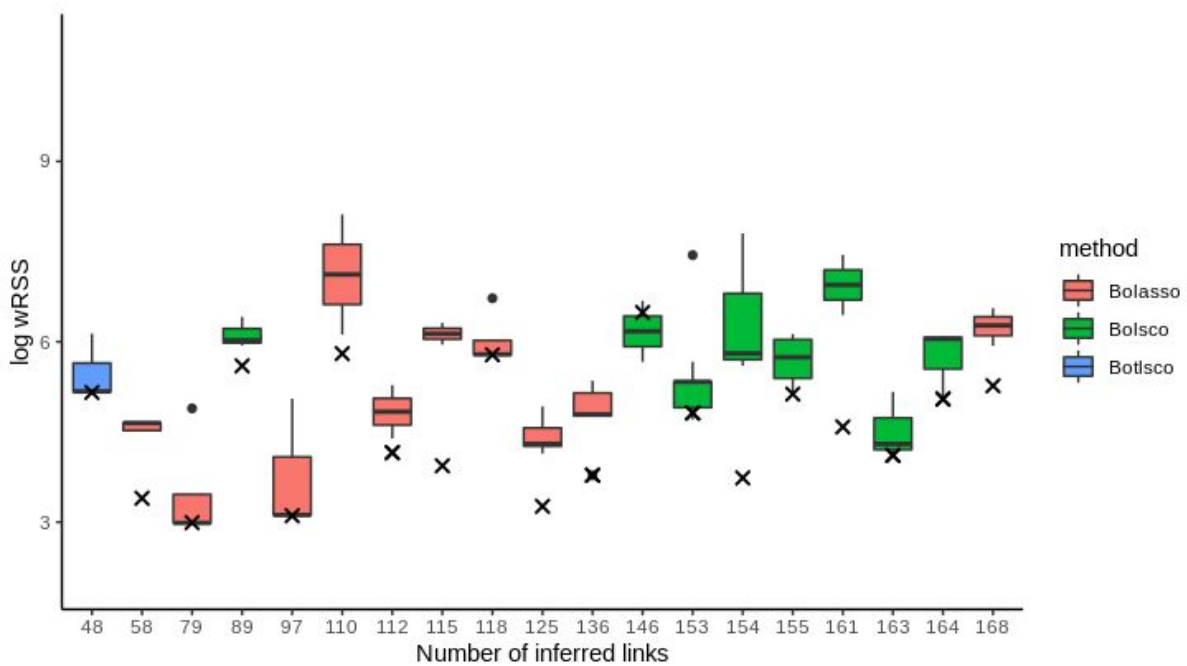

**S4 Fig.** Independent validation of inferred GRNs' fit to measured data. Each x-axis tick mark shows the prediction performance in terms of the wRSS of an inferred GRN topology fit to independent validation data under cross-validation, compared to its ability to fit shuffled data. X marks represent the inferred GRNs. The filled color box displays the median and interquartile range, and whiskers bound points maximally extending 1.5 times this range. Beyond this, outlier points are shown.

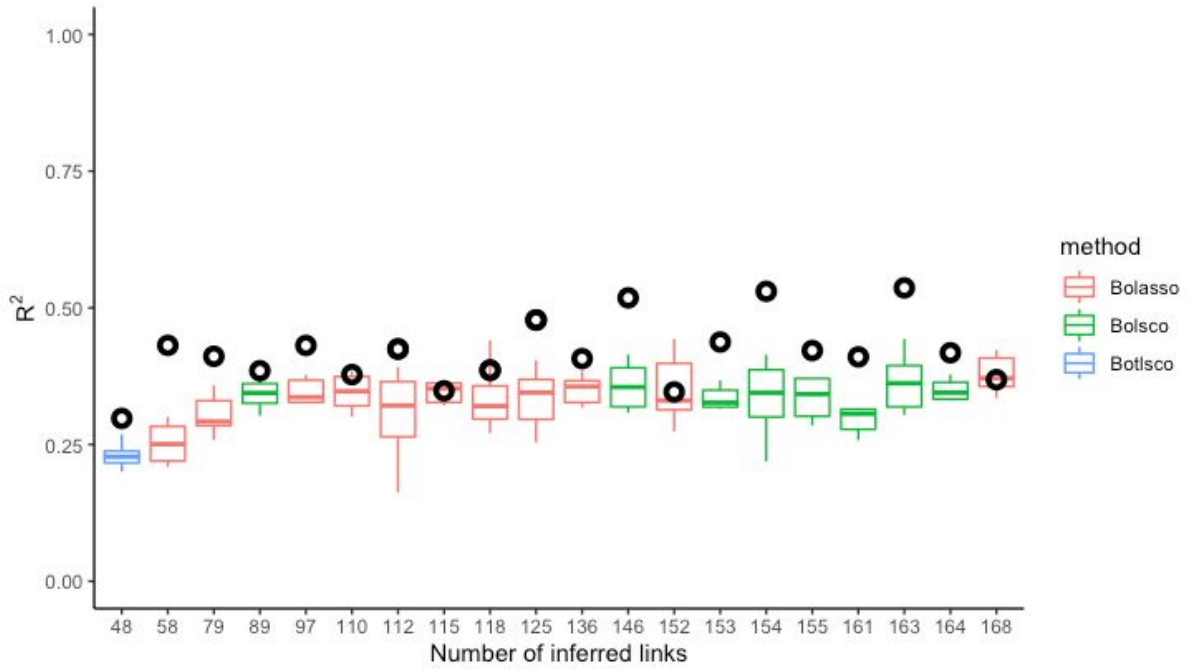

**S5 Fig.** Predictiveness of inferred GRN topologies using  $R^2$  for the same GRNs as in Fig 2.

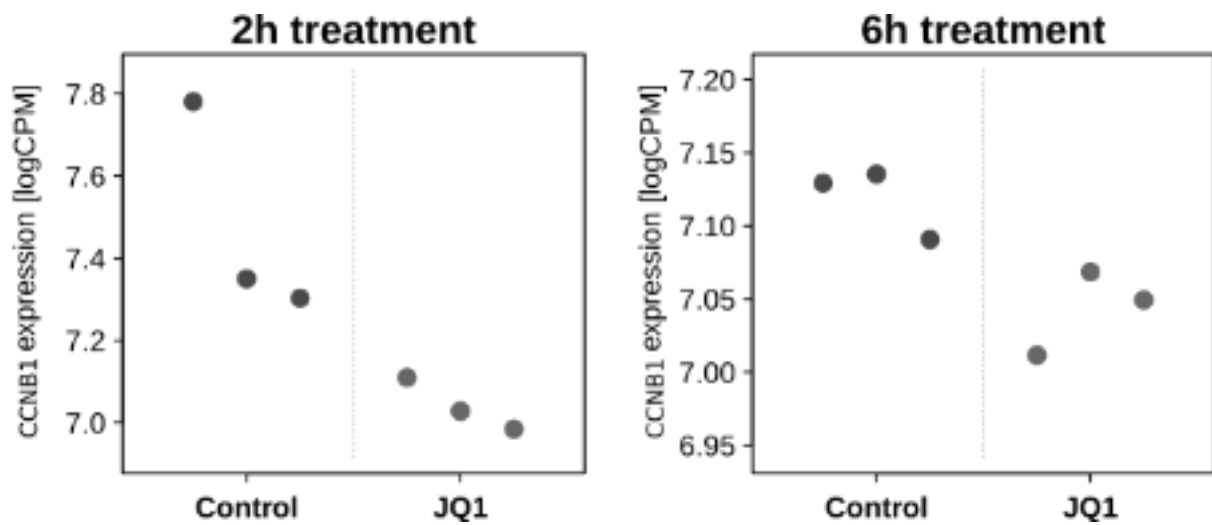

**S6 Fig.** Experimental validation in the GTML2 cell line of the predicted activation of CCNB1 by BRD4. CCNB1 expression was measured as  $\log_{10}$  of counts per million reads after 2 and 6 hours of exposure to control (DMSO) and JQ1, which inhibits BRD4. The effect on CCNB1 was significant at both time points ( $p=0.048$  and  $0.014$  by t-test).

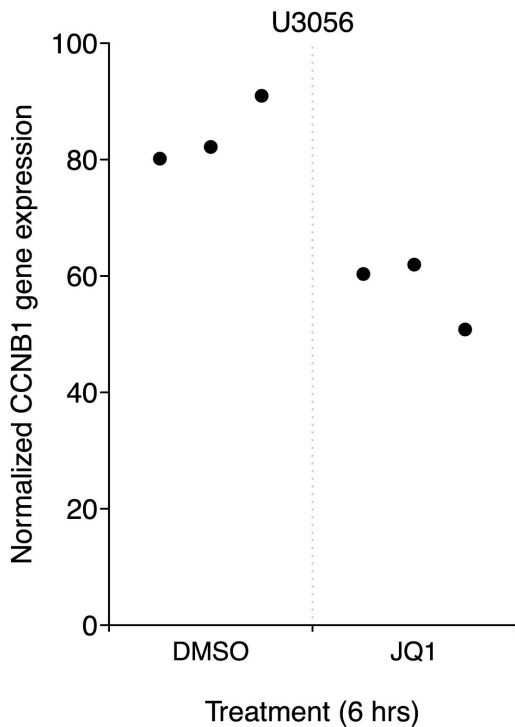

**S7 Fig.** Experimental validation in the human adult high-grade glioma U3056 cell line of the predicted activation of CCNB1 by BRD4. CCNB1 expression was measured as  $\log_{10}$  of counts per million reads after 6 hours exposure to control (DMSO) and JQ1, which inhibits BRD4. The effect on CCNB1 was significant ( $p=0.005$  by t-test).

**S1 Table.** Description of matrix contents used in the linear model for GRN inference.

| matrix | dimension (rows x columns) | contents                 | description/ value range                                                                                                           |
|--------|----------------------------|--------------------------|------------------------------------------------------------------------------------------------------------------------------------|
| Y      | 40 x 115                   | Gene expression          | SNR=0.014, max=3.3, min=-8.7, condition number=55.3                                                                                |
| A      | 40 x 40                    | Interaction matrix (GRN) | Range dependent on BFECV per init; initial inference returns variously sparse, weighted A, which is reweighted (see BFECV section) |
| P      | 40 x 115                   | Perturbation/ design     | Targeted perturbations (-1=KD, 0=no KD)                                                                                            |
| F      | 40 x 115                   | Process error            | Range dependent on BFECV per init                                                                                                  |
| E      | 40 x 115                   | Measurement error        | Range dependent on BFECV per init                                                                                                  |

**S2 Table.** Genes investigated. Description of perturbed genes in terms of pathways involved in, complexes formed, general notes (such as affect on Myc transcription), and RPKM expression in cell line A431. Pathway source material is the NCBI BioSystems Database unless otherwise noted. Complex information and General Notes are taken from NCBI. Gene names are listed as in our results and then synonyms in HGNC.

| Genes & synonyms               | Pathway                                   | Complex                                                           | Functional Annotation                                                                                                                              | RPKM |
|--------------------------------|-------------------------------------------|-------------------------------------------------------------------|----------------------------------------------------------------------------------------------------------------------------------------------------|------|
| <b>AES</b>                     | ps1pathway                                | CtBP/CBP/TCF1/TLE1/AES, beta catenin/TCF1/CtBP/CBP/TLE1/AES/SMAD4 | Transcriptional corepressor/ regulation and signaling. First complex represses MYC, second activates MYC                                           | 51.5 |
| <b>AIB1 / NCOA3</b>            | Era genomic pathway                       | E2/ERA (dimer)/AIB1                                               | Transcriptional regulation and enzymatic behavior. Nuclear receptor coactivator. Complex activates MYC                                             | 15.1 |
| <b>AKT1</b>                    | Il2 pi3kpathway                           | AKT1+plasma membrane                                              | Kinase, enzyme, oncogene, metabolism. ser/thr kinase that activates MYC when in plasma membrane, oncogene                                          | 13.2 |
| <b>BIRC5</b>                   |                                           |                                                                   | Transcription regulation. Protease inhibitor, Repressor                                                                                            | 44.1 |
| <b>BRCA1</b>                   | Myc repression pathway                    |                                                                   | Transcription regulation, DNA-binding, metabolic and enzymatic activity, Tumor suppressor. Works w/MYC to repress psoriasis, tumor suppressor gene | 16.8 |
| <b>BRD4 / (M)CAP / HUNK(L)</b> | <a href="#">PI3K/ AKT pathway</a>         | activates Myc                                                     | Transcription regulation, metabolic and enzymatic activity, common complex w/P-TEFb (Delmore 2011[26]), oncogene                                   | 8.1  |
| <b>BYSL</b>                    |                                           |                                                                   | [45,83]                                                                                                                                            | 15.5 |
| <b>CCNB1</b>                   | <a href="#">FoxO signaling pathway</a>    |                                                                   | metabolic activity, Cyclin B1 Ser/thr kinase activator                                                                                             | 145  |
| <b>CEBPB</b>                   | <a href="#">MEK/ERK signaling pathway</a> |                                                                   | Transcription factor, DNA-binding                                                                                                                  | 5.3  |
| <b>CHUK</b>                    |                                           |                                                                   | Serine kinase, metabolic                                                                                                                           | 14.6 |

|                        |                                        |                                                         |                                                                                                   |       |
|------------------------|----------------------------------------|---------------------------------------------------------|---------------------------------------------------------------------------------------------------|-------|
|                        |                                        |                                                         | activity,                                                                                         |       |
| <b>CTNNB1</b>          | <a href="#">BDNF signaling pathway</a> |                                                         | Transcription regulation, signaling, enzymatic activity, oncogene                                 | 100.5 |
|                        | <a href="#">Wnt signaling pathway</a>  |                                                         |                                                                                                   |       |
| <b>DP1</b>             | e2f pathway                            | E2F1-3/DP                                               | Transcription regulation, DNA-binding, complex activates MYC, oncogene, tumor suppressor gene     | 6.6   |
| <b>DP2</b>             | e2f pathway                            | E2F4/DP2/TRRAP, E2F4/DP2/GCN5                           | Transcription regulation, DNA-binding, complexes activate MYC                                     | 15.2  |
| <b>DVL3</b>            | Beta catenin nuc pathway               | TCF4/beta catenin/JUN/DVL3                              | Signaling, complex activates Myc                                                                  | 18.3  |
| <b>E2F4</b>            | E2f pathway                            | E2F4/DP2/TRRAP, E2F4/DP2/GCN5, CEBPA/BRM/RB1/E2F4       | Transcription regulation, DNA-binding, First two complexes activate MYC, the second represses MYC | 15.2  |
| <b>ENO1</b>            | Myc active pathway                     |                                                         | Transcription regulation, DNA-binding, metabolic activity, represses MYC                          | 919.1 |
|                        | Notch pathway                          |                                                         |                                                                                                   |       |
| <b>FOXO3A / FOXM1C</b> | Myc represions pathway                 |                                                         | Transcription regulation, DNA-binding, enzymatic activity, Tumor suppressor. [58]                 | 13.3  |
| <b>GCN1(L1)</b>        |                                        |                                                         | [73]                                                                                              | 58.3  |
| <b>GNL3</b>            |                                        |                                                         | [47]<br>[47]                                                                                      | 46.3  |
| <b>JUN*</b>            | Ap1 pathway                            | JUN/JUND                                                | activates as JUN/JUND                                                                             | 15.3  |
|                        | Betacatenin nuc pathway                | TCF4/beta catenin/JUN/DVL3                              | Transcription regulation, DNA-binding, enzymatic activity, complex activates MYC, oncogene        |       |
| <b>LKB1 / STK11</b>    | Lkb1 pathway                           | LKB1/ER alpha                                           | complex activates MYC, Kinase, metabolic activity, Tumor suppressor.                              | 10    |
| <b>MAX</b>             | Myc activation pathway                 | MYC/Max/RPL11, MYC/Max/TRRAP/TIP60/TIP49A/TIP49B/BAF53  |                                                                                                   | 21.7  |
|                        | Myc pathway                            | replication preinitiation complex, MYC/Max/TRRAP/TIP60/ | Transcription regulation, DNA-binding, Tumor suppressor.                                          |       |



|                           |                        |                                                                    |                                                                                                                                                           |      |
|---------------------------|------------------------|--------------------------------------------------------------------|-----------------------------------------------------------------------------------------------------------------------------------------------------------|------|
|                           |                        | TIP49A/TIP49B/BAF53                                                |                                                                                                                                                           |      |
|                           | Myc repression pathway | SMAD2-3/SMAD4/MYC/Max/MIZ-1,MYC/Max/NF-Y,MYC/Max/MIZ-1/ZO2,MYC/Max |                                                                                                                                                           |      |
| <b>MIZ(-)1 / ZBTB17</b>   | Myc pathway            | MYC/Max/MIZ-1                                                      | Transcription regulation, DNA-binding, Main MYC complex that represses                                                                                    | 2.5  |
|                           | Myc repression pathway | MIZ-1/p300,MYC/Max/MIZ-1,MYC/Max/MIZ-1/DNMT3A/GFI1                 |                                                                                                                                                           |      |
| <b>MYB</b>                | Cmyb pathway           | Myb,SKI/SIN3a/NCoR1/TIF1B/Myb                                      | Transcription regulation, DNA-binding, metabolic and enzymatic activity, enzymatic activity, activates as Myb; represses MYC as part of complex, oncogene | 1.5  |
| <b>MYC</b>                | Myc activation pathway | MYC/Max/RPL11,MYC/Max/TRRAP/TIP60/TIP49A/TIP49B/BAF53              | Transcription regulation, DNA-binding, oncogene,                                                                                                          | 20.7 |
|                           | Myc pathway            | MYC/Max/TRRAP/TIP60/TIP49A/TIP49B/BAF53,MYC/Max                    |                                                                                                                                                           |      |
|                           | Myc repression pathway | MYC/Max/NF-Y,MYC/Max/MIZ-1/ZO2,MYC/Max                             |                                                                                                                                                           |      |
| <b>MYCBP</b>              | Notch pathway          | MYCBP                                                              | Transcription regulation, binds to MYC, stimulates E-box transcription activation                                                                         | 30.7 |
| <b>NFKB1</b>              | Cd40 pathway           | RelA/NFkappaB1                                                     | Transcription regulation, DNA-binding, complex activates MYC                                                                                              | 15.9 |
| <b>P107 / PRB1 / RBL1</b> | Myc repression pathway |                                                                    | works w/MYC/Max to repress MYC                                                                                                                            | 15.1 |
| <b>(E)P300</b>            | Myc repression pathway | MIZ-1/p300                                                         | Transcription regulation, metabolic activity, Tumor suppressor. Makes complex w/MIZ                                                                       | 13.6 |
| <b>(T)P53</b>             | Myc activation pathway |                                                                    | Transcription regulation, DNA-binding, enzymatic activity, oncogene, tumor suppressor.                                                                    | 26.9 |
| <b>RB1</b>                | E2f pathway            | CEBPA/BRM/RB1/E2F4                                                 | Transcription regulation, DNA-binding, Tumor suppressor. complex represses MYC                                                                            | 29.3 |
| <b>RELA</b>               | Cd40 pathway           | RelA/NFkappaB1                                                     | Transcription regulation, DNA-binding, complex                                                                                                            | 19.1 |

|                       |                                                 |                                                    |                                                                                                                                                      |       |
|-----------------------|-------------------------------------------------|----------------------------------------------------|------------------------------------------------------------------------------------------------------------------------------------------------------|-------|
|                       |                                                 |                                                    | activates MYC                                                                                                                                        |       |
| <b>RPL11</b>          | Myc activation pathway                          | MYC/Max/RPL11                                      |                                                                                                                                                      | 716.1 |
| <b>SP1</b>            | Foxm1 pathway                                   | FOXM1C/SP1                                         | Transcription regulation, DNA-binding, complex works against MYC, tumor suppressor gene                                                              | 21.4  |
|                       | Myc repression pathway                          | SMAD2-3/SMAD4/SP1                                  |                                                                                                                                                      |       |
| <b>STAT3</b>          | Il6 7 pathway                                   | STAT3 dimer                                        | Transcription regulation, DNA-binding, enzymatic activity, dimer activates MYC, oncogene                                                             | 19.9  |
| <b>STAT5 A/B</b>      | Il2 stat5 pathway                               | STAT5 dimer                                        | Transcription regulation, DNA-binding, metabolic activity, dimer activates MYC (ENCODE[30]), oncogene, tumor suppressor gene                         | 7.3   |
| <b>TBP</b>            | Myc repression pathway                          |                                                    | Transcription regulation, DNA-binding, works against MYC in affecting multiple genes                                                                 | 5.8   |
| <b>TCF7L2</b>         | Wnt signaling pathway, beta catenin nuc pathway | TCF4/beta catenin/TNIK, TCF4/beta catenin/JUN/DVL3 | Transcription regulation, DNA-binding, enzymatic activity, signaling, <a href="#">complexes activate Myc (Sur 20[31])</a> , <a href="#">oncogene</a> | 5.4   |
| <b>TIF1B / TRIM28</b> | Cmyb pathway                                    | SKI/SIN3a/NCoR1/TIF1B /Myb                         | Transcription regulation, metabolic activity, part of complex that represses                                                                         | 91    |
| <b>YY1</b>            | Notch pathway                                   | NICD/YY1                                           | Transcription regulation, DNA-binding, complex activates MYC                                                                                         | 27.9  |

**S3 Table.** Comparing the best GRN to reference networks. The networks include an expected prior network gathered from data mining, as well as the TRRUST v2, FunCoup v4, HumanNet v1 and STRING v10.5 databases. P-values are from a hypergeometric test. \*links with confidence >= 0.90

| Network       | Overlapping links | Links in DB | Links in GRN | p-value |
|---------------|-------------------|-------------|--------------|---------|
| Prior network | 5                 | 40          | 86           | 0.08    |
| TRRUST        | 7                 | 132         | 86           | 0.66    |
| FunCoup       | 14                | 146         | 76           | 0.01*   |
| HumanNet      | 9                 | 81          | 76           | 0.02    |

|        |    |     |    |       |
|--------|----|-----|----|-------|
| STRING | 21 | 212 | 76 | 0.003 |
|--------|----|-----|----|-------|

**S4 Table.** Used siRNA sequences

| Symbol | Entrez Gene | Ensembl Gene    | Ambion siRNA ID | siRNA Sequences                                                      |
|--------|-------------|-----------------|-----------------|----------------------------------------------------------------------|
| AES    | 166         | ENSG00000104964 | ASX053MJ        | GCCUCAAGCUCGAAUGUGATT CAAAGACGAAUUCAGCUATT<br>GAACAUCGAGAUGCACAATT   |
| AIB1   | 8202        | ENSG00000124151 | ASX04YYH        | CAGUAUAUCGAUUCUGGUUTT CAGUAAGACAGAUACGUCATT<br>GGGCUUUUAUUGCGACAATT  |
| AKT1   | 207         | ENSG00000142208 | ASX04WP6        | GCGUGACCAUGAACGAGUUTT GAACAAUCCGAUUCACGUAATT<br>CGGUAGCACUUGACUUUUTT |
| BIRC5  | 332         | ENSG00000089685 | ASX04ZH8        | GGACCACCGCAUCUCUACATT GCAGGUCCUUUAUCUGUCATT<br>CAAAGGAACCAACAUAATT   |
| BRCA1  | 672         | ENSG00000012048 | ASX053MG        | GACCCAGUCUAUUAAGAATT CAGCUACCCUUCACAUATT<br>CAUGCAACAUAACCGUAATT     |
| BRD4   | 23476       | ENSG00000141867 | ASX051I6        | UGAGCACAUAACAAGUCUATT AGAUUGAAUUCGACUUUGATT<br>CCUGAUUACUAUAGAUAATT  |
| BSL1   | 705         | ENSG00000112578 | ASX055LN        | AGGUGGUUGUGGACCCUGATT CCAGGAUUUUUGCCUUAATT<br>GGGAGGUUUUAUUAAGUATT   |
| CCNB1  | 891         | ENSG00000134057 | ASX04ZMX        | CAACAUAUACCGUCUAUAUATT GAAUUGUACCCUCCAGAAATT<br>CACUUAUAUAAGCACAATT  |
| CEBPB  | 1051        | ENSG00000172216 | ASX04ZP9        | CCGCCUGCCUUUAUUAUATT GGCUCGAGUAUUCGCUUATT<br>GUAUUAUUUGGAUUCUUTT     |
| CHUK   | 1147        | ENSG00000213341 | ASX04WNH        | GGACUAAAAGAAGACUAUATT GAAGGAUCCAAAGUGUAUATT<br>GCCUAGAGCUAAGUACCAATT |
| CTNNA1 | 1499        | ENSG00000168036 | ASX04X6P        | GGACCUUAUCUACGAAATT GGAUGUCCACAACCGAAUUTT<br>CUGUUGGAUUGAUUGAAATT    |
| DP1    | 7027        | ENSG00000198176 | ASX04XZ1        | CAUCUCCAAUGACAAUUAUATT GCAAGAAGCAGGUAUCGATT<br>GCUCCAAUGGUGUCAGUATT  |
| DP2    | 7029        | ENSG00000114126 | ASX04XZ2        | GGUUAUGCUUGGAGUCAGATT GAUCCAUGAUGCAUAGAATT<br>GGACUACUUCGACUUAATT    |
| DVL3   | 1857        | ENSG00000161202 | ASX04X6U        | GGUAAACGAGAUACAUCUATT CCAGCUUCUUUGACUCAGATT<br>CGGUCACUCUACAUCGATT   |
| E2F4   | 1874        | ENSG00000205250 | ASX04ZWZ        | AGAAUUCUUUGAUCCACATT GUAUUGGCUUAUUCGAGAATT<br>GGAUUUACGACAUUCCAATT   |
| ENO1   | 2023        | ENSG00000074800 | ASX04ZYQ        | CCGUGACCGAGUCUCUATT GCAGGUACUUCGCGCUGATT<br>CAGUGGUGUUAUCGAATT       |
| FOXM1C | 2305        | ENSG00000111206 | ASX0501W        | GCUCAUACCGUACCUUATT CACUAUCAACAUAUAGCUUATT<br>GGAUCAAGAUUAUUAACCATT  |
| GCN1L1 | 10985       | ENSG00000089154 | ASX0518S        | GGUGUAACCGAUUCUUAATT GCAGCCUUUGUCUUAUATT<br>GGCAGUUAUUGGUAUATT       |
| GNL3   | 26354       | ENSG00000163938 | ASX051NW        | GGUUGGAGUAUUGGUUUTT GUAUUGGUAUAGCAUUAATT<br>CCUCCGAGUUGUCUUAATT      |
| JUN    | 3725        | ENSG00000177606 | ASX050EK        | GGCACAGCUUAACAGAAATT GGAUCAAGCGGAGAGGAATT<br>CCAAGUGCCGAAAGGAATT     |
| LKB1   | 6794        | ENSG00000118046 | ASX04WWS        | GGCUCUACGGCAGGUGATT ACAUACCACGGGUCUGUATT<br>AGGAGGUUACGGCACAAATT     |
| MAX    | 4149        | ENSG00000125952 | ASX050J3        | CAACGGGCUCAUCAUAUATT CACACACACAGCAGAUATT<br>CAAAGACAGCUUACAGUATT     |
| MYB    | 4602        | ENSG00000118513 | ASX050LY        | CCUCUCAUCUAGUAGAATT GGAAGAGCAUUAAGGAATT<br>GAAUUGCUUUAUUGCAATT       |
| MYC    | 4609        | ENSG00000136997 | ASX050M5        | ACAGCCACUGGUCUUAATT GAGCUAAACGAGCUCUUAATT<br>AGACCUCAUCAAAAUAUATT    |
| MYCBP  | 26292       | ENSG00000214114 | s25391          | GUAUGAAGCUAUUGUAATT UUCUACAUAUAGCUUAUUAATT                           |
| NFKB1  | 4790        | ENSG00000109320 | ASX053S7        | GGCUCUUAUACAGCUUUTT CCACCUCAUUCUACAUCUUTT<br>GCAGCUGUAUUAAGUUAUATT   |
| P107   | 5933        | ENSG00000080839 | ASX04XXC        | GCUCUUUGCCUUAUAGCUCATT GGAUGGACUAGUCAAAUCUUTT<br>CCACCAAGUUUACCGAATT |
| P300   | 2033        | ENSG00000100393 | ASX04ZYU        | GGACUACCCUUAUUAUUAATT CCACUACUGGAAUUCGGAATT<br>GCCUGGUUAUUAUUAUUAATT |
| P53    | 7157        | ENSG00000141510 | ASX053MH        | GUAUUCUACUGGACGGAATT GAAUUGGUGGUGGAGUATT<br>GGUGAACCUUAUUAUUAATT     |
| RB1    | 5925        | ENSG00000139687 | ASX04XXA        | GGAUAGCAAACAACUAGATT CCAGUACCAAGUUGUAUUAATT<br>GCGUGUAAUUAUUAUUAATT  |
| RELA   | 5970        | ENSG00000173039 | ASX04XXT        | CCUUUAACGUAUCCUGUATT GGAGUACCCUGAGGCUUAUATT<br>GGAUUGAGGAGAACGUATT   |
| RPL11  | 6135        | ENSG00000142676 | ASX0571N        | GGUGCGGAGUAUAGUUAATT CAUCUUCACAGUAUUCGATT<br>GGAACUUCGCAUCCGAAATT    |
| SP1    | 6667        | ENSG00000185591 | ASX04Y7O        | GGCAGACUUUAACAUCUATT CCACAGCCCAACAACAUCUATT<br>GCAACAUGGGAUUAUUAATT  |

|        |       |                 |          |                                                                       |
|--------|-------|-----------------|----------|-----------------------------------------------------------------------|
| STAT3  | 6774  | ENSG00000168610 | ASX04Y94 | GCACCUUCCUGCUAAGAUU TT GGCUGGACAAUAUCAUGATT<br>GCCUCAAGAUUGACCUAGATT  |
| STAT5B | 6777  | ENSG00000173757 | ASX04Y97 | CACCCGCAAUGAUUACAGU TT GGAGACUUGAAUACCUUATT<br>GCAUCACCAUUGCUUGGAATT  |
| TBP    | 6908  | ENSG00000112592 | ASX04XTS | CCAACAAUUUAGUAGUUU TT GCCUAUUCAGAACACCAU TT<br>CAGUGAAUCUUGGUUAATT    |
| TCF7L2 | 6934  | ENSG00000148737 | ASX04XU9 | GAUGGAAGCUUACUAGA U TT CAUGAUAUCAGAAACGAU TT<br>GGUCAACCAGUGUACCCA TT |
| TIF1B  | 10155 | ENSG00000130726 | ASX05101 | GGCCCUAUUCUGUCACGA TT GCAACAUGCAGAAGAGCATT<br>GCGGAAUUGAGCGUGUA TT    |
| YY1    | 7528  | ENSG00000100811 | ASX053W2 | AGCUUUUUGUAGAGAUU CATT AGAACUCACCUCCUGAUUATT<br>CAGAAUAUAUGACAGGAATT  |

**S5 Table.** TaqMan assays used for qPCR in Fluidigm Biomark

| TATAA Assay | Gene   | TaqMan Assay  |
|-------------|--------|---------------|
| AES         | AES    | Hs01081011_g1 |
| AKT1        | AKT1   | Hs00920503_m1 |
| BCL2        | BCL2   | Hs00236808_s1 |
| BIRC5       | BIRC5  | Hs04194392_s1 |
| BRCA1       | BRCA1  | Hs01556193_m1 |
| BRD4        | BRD4   | Hs04188087_m1 |
| BYSL        | BYSL   | Hs00608266_m1 |
| CCNB1       | CCNB1  | Hs01030103_m1 |
| CEBPB       | CEBPB  | Hs00270923_s1 |
| CHUK        | CHUK   | Hs00989502_m1 |
| CTBP1       | CTBP   | Hs00972284_m1 |
| CTNNB1      | CTNNB1 | Hs00170025_m1 |
| DVL3        | DVL3   | Hs00610263_m1 |
| E2F4        | E2F4   | Hs00608098_m1 |
| ENO1        | ENO1   | Hs00361415_m1 |
| EP300       | P300   | Hs00914223_m1 |
| FOXM1       | FOXM1C | Hs01073586_m1 |
| GCN1L1      | GCN1L1 | Hs00412445_m1 |
| GNL3        | GNL3   | Hs00205071_m1 |
| JUN         | JUN    | Hs01103582_s1 |
| JUND        | JUND   | Hs00534289_s1 |
| MAX_g1      | MAX    | Hs00811069_g1 |
| MAX_m1      | MAX    | Hs01105523_m1 |
| MYB         | MYB    | Hs00920556_m1 |
| MYC         | MYC    | Hs00153408_m1 |
| MYCBP-GJA+  | MYCBP  | Hs00429315_g1 |
| MYCL        | LMYC   | Hs00607136_g1 |
| MYCL1       | LMYC   | Hs00420495_m1 |
| MYCN        | NMYC   | Hs00232074_m1 |

|        |        |               |
|--------|--------|---------------|
| NCOA3  | AIB1   | Hs00180722_m1 |
| NFKB1  | NFKB1  | Hs00765730_m1 |
| RB1    | RB1    | Hs01078066_m1 |
| RBL1   | P107   | Hs00765707_m1 |
| RELA   | RELA   | Hs01042010_m1 |
|        |        |               |
| RPL11  | RPL11  | Hs00831112_s1 |
| SP1    | SP1    | Hs00916521_m1 |
| STAT3  | STAT3  | Hs01047580_m1 |
| STAT5B | STAT5B | Hs00560035_m1 |
| STK11  | LKB1   | Hs00975988_m1 |
| TBP    | TBP    | Hs00427620_m1 |
| TCF7L2 | TCF7L2 | Hs01009044_m1 |
| TFDP1  | DP1    | Hs00955491_gH |
| TFDP2  | DP2    | Hs00963605_m1 |
| TP53   | P53    | Hs01034249_m1 |
| TRIM28 | TIF1B  | Hs00232212_m1 |
| YY1    | YY1    | Hs00231533_m1 |
| ZBTB17 | MIZ1   | Hs01114794_g1 |

**S6 Table.** Literature review leading to 303 initial genes of interest. PID and FunCoup refer to [37] and [39], respectively, updated and online at <https://www.ndexbio.org/> and <http://funcoup.sbc.su.se/>.

| Gene/protein                                                                                                                                                              | Source                  |
|---------------------------------------------------------------------------------------------------------------------------------------------------------------------------|-------------------------|
| sae1                                                                                                                                                                      | Amente 2012             |
| usp2                                                                                                                                                                      | Benassi 2012            |
| ybx1                                                                                                                                                                      | Bommert 2012            |
| cd19                                                                                                                                                                      | Chung 2012              |
| srsf1                                                                                                                                                                     | Das 2012                |
| brd4, brdt, brd2, brd3                                                                                                                                                    | Delmore 2011            |
| gata2, gtf2f1, rad21, smc3, ctf, zbtb7a                                                                                                                                   | ENCODE                  |
| cdk9, top2a, topbp1, ddx20, fbl, hnrnpf, eif3e, lmna, nono, psma1, nup153, carm1, mybbp1, cct5, nol11, calm1, calm3, brd8, mms19, mapk1, ep400, usp28, actb, eml3, gcn111 | Funcoup                 |
| cebpb                                                                                                                                                                     | Funcoup,                |
| gnl3                                                                                                                                                                      | Funcoup, Zwolinska 2012 |
| slc7a                                                                                                                                                                     | Hayashi 2012            |
| uba2                                                                                                                                                                      | Kessler 2012            |
| pfdn5                                                                                                                                                                     | Kimura 2007             |
| gpc3                                                                                                                                                                      | Li 2012                 |
| hif1a                                                                                                                                                                     | Doe 2012                |
| pirh2                                                                                                                                                                     | Hakem 2011              |

|                                                                                                                                                                                                                                                                                                                                                                                                                                                                                                                                                                                                                                                                                                                                                                                                                                                                                                                                                                                                                                                                                                                                                                                                                                                                                                                                                                                                                                                                                                                                                                                                                                                                                                                                                                        |                                                       |
|------------------------------------------------------------------------------------------------------------------------------------------------------------------------------------------------------------------------------------------------------------------------------------------------------------------------------------------------------------------------------------------------------------------------------------------------------------------------------------------------------------------------------------------------------------------------------------------------------------------------------------------------------------------------------------------------------------------------------------------------------------------------------------------------------------------------------------------------------------------------------------------------------------------------------------------------------------------------------------------------------------------------------------------------------------------------------------------------------------------------------------------------------------------------------------------------------------------------------------------------------------------------------------------------------------------------------------------------------------------------------------------------------------------------------------------------------------------------------------------------------------------------------------------------------------------------------------------------------------------------------------------------------------------------------------------------------------------------------------------------------------------------|-------------------------------------------------------|
| sirt1                                                                                                                                                                                                                                                                                                                                                                                                                                                                                                                                                                                                                                                                                                                                                                                                                                                                                                                                                                                                                                                                                                                                                                                                                                                                                                                                                                                                                                                                                                                                                                                                                                                                                                                                                                  | Menssen 2012                                          |
| ezh2, eed, suz12                                                                                                                                                                                                                                                                                                                                                                                                                                                                                                                                                                                                                                                                                                                                                                                                                                                                                                                                                                                                                                                                                                                                                                                                                                                                                                                                                                                                                                                                                                                                                                                                                                                                                                                                                       | Neri 2012                                             |
| yeats4                                                                                                                                                                                                                                                                                                                                                                                                                                                                                                                                                                                                                                                                                                                                                                                                                                                                                                                                                                                                                                                                                                                                                                                                                                                                                                                                                                                                                                                                                                                                                                                                                                                                                                                                                                 | Piccinni 2011                                         |
| bag2                                                                                                                                                                                                                                                                                                                                                                                                                                                                                                                                                                                                                                                                                                                                                                                                                                                                                                                                                                                                                                                                                                                                                                                                                                                                                                                                                                                                                                                                                                                                                                                                                                                                                                                                                                   | Zhang 2012                                            |
| mx1, mxi1, mcd3                                                                                                                                                                                                                                                                                                                                                                                                                                                                                                                                                                                                                                                                                                                                                                                                                                                                                                                                                                                                                                                                                                                                                                                                                                                                                                                                                                                                                                                                                                                                                                                                                                                                                                                                                        | Luscher 2012                                          |
| braf, kras                                                                                                                                                                                                                                                                                                                                                                                                                                                                                                                                                                                                                                                                                                                                                                                                                                                                                                                                                                                                                                                                                                                                                                                                                                                                                                                                                                                                                                                                                                                                                                                                                                                                                                                                                             | Magudia 2012                                          |
| nampt, kiaa1967                                                                                                                                                                                                                                                                                                                                                                                                                                                                                                                                                                                                                                                                                                                                                                                                                                                                                                                                                                                                                                                                                                                                                                                                                                                                                                                                                                                                                                                                                                                                                                                                                                                                                                                                                        | Menssen 2012                                          |
| L-myc, N-myc, mycnos                                                                                                                                                                                                                                                                                                                                                                                                                                                                                                                                                                                                                                                                                                                                                                                                                                                                                                                                                                                                                                                                                                                                                                                                                                                                                                                                                                                                                                                                                                                                                                                                                                                                                                                                                   | Myc family                                            |
| ACP5, APEX1, CCKBR, CDC25C, CKS2, ACBP, DKC1, FASN, H2AFZ, HSPA8, HSPE1, MGST1, RPL3, RPS16, SRM, SURF6, JTV1, SFRS2, RPL5                                                                                                                                                                                                                                                                                                                                                                                                                                                                                                                                                                                                                                                                                                                                                                                                                                                                                                                                                                                                                                                                                                                                                                                                                                                                                                                                                                                                                                                                                                                                                                                                                                             | myccancergene.org                                     |
| rnf115                                                                                                                                                                                                                                                                                                                                                                                                                                                                                                                                                                                                                                                                                                                                                                                                                                                                                                                                                                                                                                                                                                                                                                                                                                                                                                                                                                                                                                                                                                                                                                                                                                                                                                                                                                 | Narita 2012                                           |
| stub1                                                                                                                                                                                                                                                                                                                                                                                                                                                                                                                                                                                                                                                                                                                                                                                                                                                                                                                                                                                                                                                                                                                                                                                                                                                                                                                                                                                                                                                                                                                                                                                                                                                                                                                                                                  | Paul 2013                                             |
| myc, max, eno1, eno1, myb, bysl, miz-1, miz-1, cebpa, cebpa, cbp, cbp, akt1, e2f4, p107, p53, aes, ikk alpha, ctbp, sp1, sp1, ttp, tcf1, tle1, yy1, mycbb, beta catenin, beta catenin, e2f3, foxm1c, jun, jun, rpl11, dp2, dvl3, p300, p300, er alpha, er alpha, gcn5, gcn5, gcn5, irf-8, jund, nfkappab1, nicd, rb1, rela, ski, brm, stat5a, stat5b, lkb1, dp1, aib1, ncor1, tif1b, cyclin b1, creb1, brca1, id2, id2, ubf, wnt5a, survivin, cad, cyclin d2, cebpd, hsp70, hsp60, trap, trap, trap, bax, bcat1, bcl2, bmi1, bn51, cdc25a, cdk4, p21cip1, rcc1, eif2a, eif4a1, eif4e, eif4g1, hmgcs2, hsp90, irp2, kir3dl1, ldha, mmp9, pro-mmp9, nbs1, nucleolin, nme1, odc, pfm, serpin1, ptma, rantes, shmt1, glut1, snai1, taf4b, tert, tfr, tk1, fra1, ddx18, mta1, aldh9a1, zfp3611, p27kip1, clusterin, col1a2, chop, dnnt, erbb2, fth1, gtf2h2, alpha6 integrin, beta1 integrin, beta4 integrin, galectin-1, pdgfrb, ppp2r4, psoriasin, sfrp1, tsc2, csde1, smad4, smad4, smad2, smad3, smad3, hmgly, noxa, p15ink4b, hdac3, gfi1, pim1, baf53, baf53, taf10, taf10, taf12, taf12, spt3, spt3, tip49a, tip49a, staf65g, staf65g, nfya, nfyb, nfyb, p14arf, pml4, zo2, hect9, skp2, gsk3beta, pin1, ppp2ca, pp2a b56alpha, axin1, dleu2, gadd45a, pak2, nramp1, spi1, hdac1, cyclin d1, c-flip, dnmt3a, taf9, taf9, brg1, C-flip p12, C-flip p43, cbp/p300, dyskerin, e2, E2f1-3, fbw7-alpha/usp28, smad2-3-active, tert, gapdh, dleu1, ndrg1, tip60, tip60, mad4, tip49b, tip49b, prdx3, pdcd10, dkk1, tnik, peg10, tmeff2, sin3a, hbp1, fbw7-gamma, ndrg2, gpat, myct1, sfxn3, tcf3, jpo1, tmem126a, mina53, mimitin, aeg-1, lin28b, mirlet7g, mir141, mir146a, mir17, mir200a, mir22, mir23b, mir26a1, mir26a2, mir26b, mir34a, mir9-3, mir338, mir429, nme2 | PID                                                   |
| npm1                                                                                                                                                                                                                                                                                                                                                                                                                                                                                                                                                                                                                                                                                                                                                                                                                                                                                                                                                                                                                                                                                                                                                                                                                                                                                                                                                                                                                                                                                                                                                                                                                                                                                                                                                                   | PID, Funcoup                                          |
| foxo3a                                                                                                                                                                                                                                                                                                                                                                                                                                                                                                                                                                                                                                                                                                                                                                                                                                                                                                                                                                                                                                                                                                                                                                                                                                                                                                                                                                                                                                                                                                                                                                                                                                                                                                                                                                 | PID, Peck 2013                                        |
| stat3                                                                                                                                                                                                                                                                                                                                                                                                                                                                                                                                                                                                                                                                                                                                                                                                                                                                                                                                                                                                                                                                                                                                                                                                                                                                                                                                                                                                                                                                                                                                                                                                                                                                                                                                                                  | PID; ENCODE indicated this bound MYC                  |
| tcf4                                                                                                                                                                                                                                                                                                                                                                                                                                                                                                                                                                                                                                                                                                                                                                                                                                                                                                                                                                                                                                                                                                                                                                                                                                                                                                                                                                                                                                                                                                                                                                                                                                                                                                                                                                   | PID; Sur 2012                                         |
| smarca4                                                                                                                                                                                                                                                                                                                                                                                                                                                                                                                                                                                                                                                                                                                                                                                                                                                                                                                                                                                                                                                                                                                                                                                                                                                                                                                                                                                                                                                                                                                                                                                                                                                                                                                                                                | Romero 2012; also, ENCODE indicated that it bound MYC |
| cdk1, cdk2                                                                                                                                                                                                                                                                                                                                                                                                                                                                                                                                                                                                                                                                                                                                                                                                                                                                                                                                                                                                                                                                                                                                                                                                                                                                                                                                                                                                                                                                                                                                                                                                                                                                                                                                                             | Goga 2007, Campaner 2010, García-Gutiérrez 2019       |
| oct4, sox2, klf4                                                                                                                                                                                                                                                                                                                                                                                                                                                                                                                                                                                                                                                                                                                                                                                                                                                                                                                                                                                                                                                                                                                                                                                                                                                                                                                                                                                                                                                                                                                                                                                                                                                                                                                                                       | Qi 2007                                               |
| tp63                                                                                                                                                                                                                                                                                                                                                                                                                                                                                                                                                                                                                                                                                                                                                                                                                                                                                                                                                                                                                                                                                                                                                                                                                                                                                                                                                                                                                                                                                                                                                                                                                                                                                                                                                                   | Wu 2012                                               |
| dlc1                                                                                                                                                                                                                                                                                                                                                                                                                                                                                                                                                                                                                                                                                                                                                                                                                                                                                                                                                                                                                                                                                                                                                                                                                                                                                                                                                                                                                                                                                                                                                                                                                                                                                                                                                                   | Zimonjic 2012                                         |
